# Supplementary material for: Inclusion of technology affinity in self scale–Development and evaluation of a single item measurement instrument for technology affinity
Source: Frontiers journal article supplement (doi:10.3389/feduc.2022.970212), 2022-09-13
Supplement: Data_Sheet_1.pdf [file Data_Sheet_1.pdf]

## *Supplementary Material*

### 1 Supplementary Figures and Tables

Supplementary Table 1: English translation of the TAEG questionnaire. Note that this is an unofficial translation which was not checked for validity. In our study we used the German version of the questionnaire.

| Subscale                                   | Items (scale from "Strongly disagree" (1) to "Strongly agree" (5))                                                                                                                                                                                                                                                                                                          |
|--------------------------------------------|-----------------------------------------------------------------------------------------------------------------------------------------------------------------------------------------------------------------------------------------------------------------------------------------------------------------------------------------------------------------------------|
| Enthusiasm for technology                  | <ul style="list-style-type: none"> <li>• I read up on technical systems even if I have no intention of buying them.</li> <li>• I love to own new technical systems.</li> <li>• I get excited when new technical systems come on the market.</li> <li>• I enjoy going to specialty stores for technical systems.</li> <li>• I enjoy trying out technical systems.</li> </ul> |
| Competence in dealing with technology, and | <ul style="list-style-type: none"> <li>• I know most of the functions of the technical systems I own.</li> <li>• I have or would have comprehension problems reading magazines about technical systems.</li> <li>• I find it easy to learn how to operate technical systems.</li> <li>• I know my way around technical systems.</li> </ul>                                  |
| Positive consequences of technology        | <ul style="list-style-type: none"> <li>• Technical systems help to get information.</li> <li>• Technical systems enable a high standard of living.</li> <li>• Technical systems increase security.</li> <li>• Technical systems make people independent.</li> <li>• Technical systems make my everyday life easier.</li> </ul>                                              |
| Negative consequences of technology        | <ul style="list-style-type: none"> <li>• Technical systems reduce personal contact between people.</li> <li>• Technical systems cause stress.</li> <li>• Technical systems make people sick.</li> <li>• Technical systems make many things more cumbersome.</li> <li>• Technical systems lead to mental impoverishment.</li> </ul>                                          |

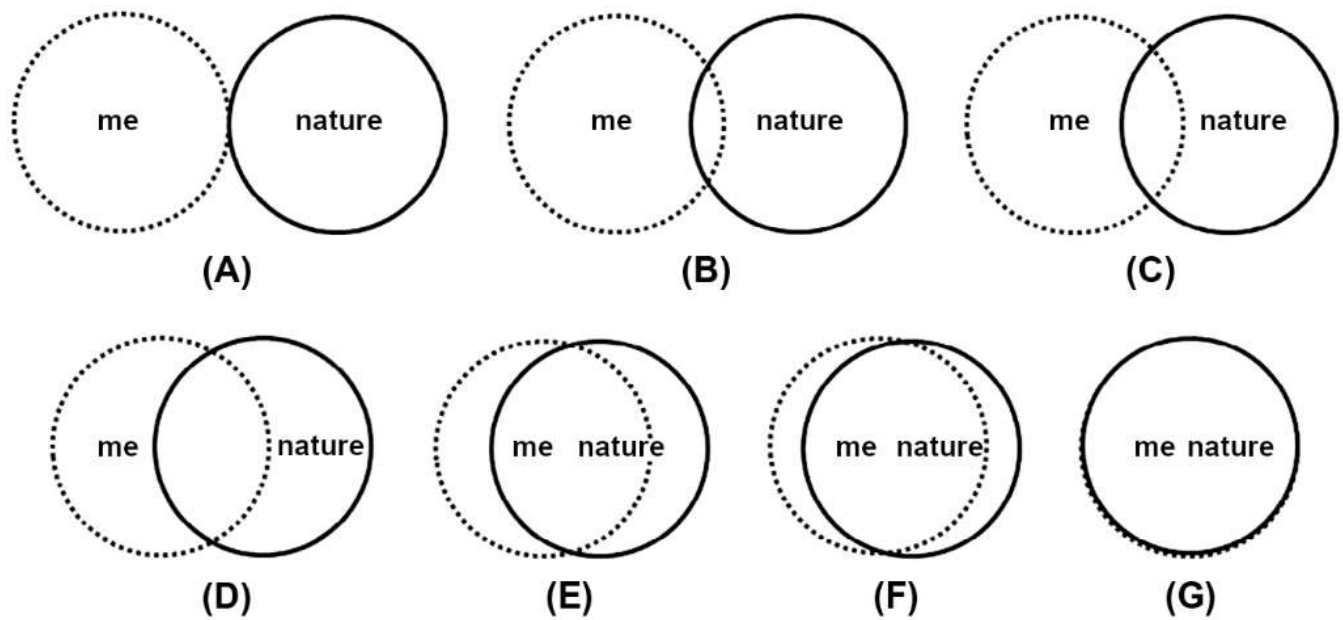

Supplementary Figure 1: With the inclusion of nature in self scale a person's connection to nature is measured. Participants must choose the pair of circles that best describes their relationship with nature.
